# Supplementary material
Source: PubMed Central journal article supplement (PMC6703914)
Supplement: NIHMS1536557-supplement-1.pdf [file NIHMS1536557-supplement-1.pdf]

**Supplemental Table S1.** Sequence of oligonucleotide primers used.

| <b>Gene name</b> | <b>Forward Primer</b>      | <b>Reverse Primer</b>      |
|------------------|----------------------------|----------------------------|
| DSG1             | AAA GCA CTG AAC CAG TTT GC | CAC AGA GGG CTT CAG AGT GT |
| DSP              | TGT ACG ACT GGA GCG ACA AG | GCG TCT GCA GAG TGT CCA TA |
| TJP              | CGT GCT GAC TTC TGG AGA TT | CTC TTG CCA GCT TTT CTC TG |
| E-Cadherin       | CTGAGAACGAGGCTAACG         | TTCACATCCAGCACATCC         |
| TBP              | GATAAGAGAGCCACGAACCAC      | CAAGAACTTAGCTGGAAAACCC     |
| IL-8             | TAG CAA AAT TGA GGC CAA GG | AGC AGA CTA GGG TTG CCA GA |
| IL-1 $\beta$     | TTC GAC ACA TGG GAT AAC GA | TCT TTC AAC ACG CAG GAC AG |
| CXCL1            | AGG GAA TTC ACC CCA AGA AC | CAC CAG TGA GCT TCC TCC TC |
| CXCL2            | CAC TCA AGA ATG GGC AGA AA | CCT CTG CAG CTG TGT CTC TC |

**Supplemental Table 2.** List of antibodies used in the study, and their source

| <b>Antibody</b>            | <b>Source</b>             | <b>Catalog Number</b> |
|----------------------------|---------------------------|-----------------------|
| Anti-Desmoglein1           | Santa Cruz Biotechnology  | SC-20114              |
| Anti-Desmoplakin I/II      | Santa Cruz Biotechnology  | SC-33555              |
| Anti-ZO-1                  | Santa Cruz Biotechnology  | SC-10804              |
| Anti-E-Cadherin            | BD Biosciences            | 610182                |
| Anti-NF- $\kappa$ B        | Cell Signaling Technology | 6956, 8242            |
| Anti-I $\kappa$ B $\alpha$ | Cell Signaling Technology | 4814                  |
| Anti-TBP                   | Cell Signaling Technology | 44059                 |
| Anti-Actin                 | Cell Signaling Technology | 8457                  |
